# Supplementary material for: Nucleus pulposus phenotypic markers to determine stem cell differentiation: fact or fiction?
Source: PubMed Central journal article supplement (PMC4823028; doi:10.18632/oncotarget.6782), 2015-12-28
Supplement: oncotarget-07-2189-s001.pdf [file oncotarget-07-2189-s001.pdf]

## Nucleus pulposus phenotypic markers to determine stem cell differentiation: fact or fiction?

### Supplementary Material

#### Supplementary Table I: IVD samples processed at Sheffield Hallam University: Patient Details.

| Reference | Source   | IVD Level | Infiltrating Cells | Average Grade | Classification | DE | IHC |
|-----------|----------|-----------|--------------------|---------------|----------------|----|-----|
| HD 1      | Surgical | L4/L5     | No                 | 3.0           | I              | ✓  | ✓   |
| HD 2      | Surgical | L5/S1     | Yes                | 7.0           | I              | ✓  |     |
| HD 3      | Surgical | L4/L5     | No                 | 4.0           | MD             | ✓  |     |
| HD 5      | Surgical | L5/S1     | No                 | 8.5           | SD             | ✓  |     |
| HD 9      | Surgical | L5/S1     | No                 | 2.0           | ND             |    | ✓   |
| HD 17     | Surgical | L5/S1     | Yes                | 4.0           | ND             | ✓  |     |
| HD 21     | Surgical | L4/L5     | Yes                | 4.0           | I              | ✓  |     |
| HD 24     | Surgical | L5/S1     | No                 | 2.0           |                |    | ✓   |
| HD 25     | Surgical | L4/L5     | No                 | 2.0           | I              | ✓  |     |
| HD 26     | Surgical | L5/S1     | No                 | 5.0           | I              | ✓  |     |
| HD 30     | PM (SHU) | L4/L5     | No                 | 2.0           |                | ✓  |     |
| HD 31     | PM (SHU) | L3/L4     | No                 | 3.0           | ND             |    | ✓   |
| HD 34     | Surgical | L5/S1     | Yes                | 12.0          | SD             | ✓  |     |
| HD 44     | Surgical | L5/S1     | No                 | 2.0           | ND             | ✓  |     |
| HD 45     | Surgical | L5/S1     | No                 | 8.0           | SD             | ✓  |     |
| HD 53     | Surgical | L5/S1     | No                 | 7.0           | MD             | ✓  |     |
| HD 54     | Surgical | L4/L5     | No                 | 6.0           | SD             | ✓  | ✓   |
| HD 56     | Surgical | L5/S1     | Yes                | 5.0           | MD             | ✓  | ✓   |
| HD 57     | Surgical | L5/S1     | No                 | 6.0           | MD             | ✓  | ✓   |
| HD 58     | Surgical | L5/S1     | No                 | 3.5           | SD             | ✓  |     |
| HD 59     | Surgical | L5/S1     | No                 | 6.0           | SD             | ✓  |     |
| HD 61     | Surgical | L5/S1     | No                 | 7.5           | MD             | ✓  | ✓   |
| HD 63     | Surgical | L5/S1     | No                 | 9.0           | SD             | ✓  | ✓   |
| HD 65     | Surgical | L4/L5     | No                 | 10.0          | SD             | ✓  |     |
| HD 66     | Surgical | L3/L4     | Yes                | 5.0           | I              | ✓  |     |
| HD 71     | Surgical | L5/S1     | Yes                | 3             | MD             |    | ✓   |
| HD 75     | Surgical | L3/L4     | No                 | 8.0           | MD             | ✓  | ✓   |
| HD 79     | Surgical | L4/L5     | No                 | 3.0           | ND             | ✓  | ✓   |
| HD 85     | Surgical | L2/L3     | No                 | 8.0           | I              | ✓  |     |
| HD 86     | Surgical | L5/S1     | Yes                | 1.0           | I              | ✓  |     |
| HD 92     | Surgical | L5/S1     | No                 | 3.5           | ND             | ✓  |     |
| HD 93     | Surgical | L5/S1     | Yes                | 6.0           | MD             | ✓  | ✓   |
| HD 94     | Surgical | L5/S1     | No                 | 6.0           | MD             | ✓  |     |
| HD 97     | Surgical | L5/S1     | No                 | 6.0           | MD             | ✓  | ✓   |

|    |     |          |       |     |      |    |   |   |
|----|-----|----------|-------|-----|------|----|---|---|
| HD | 98  | Surgical | L3/L4 | No  | 6.0  | MD | ✓ |   |
| HD | 109 | Surgical | L4/L5 |     | 6.0  |    |   |   |
| HD | 133 | Surgical | L4/L5 | No  | 3.5  |    |   | ✓ |
| HD | 144 | Surgical | L5/S1 | No  | 5.0  |    | ✓ | ✓ |
| HD | 145 | Surgical | L4/L5 | No  | 11   | SD | ✓ |   |
| HD | 146 | Surgical | L5/S1 | No  | 5.85 | MD | ✓ |   |
| HD | 148 | Surgical | C5/C6 | No  | 6.0  | MD | ✓ |   |
| HD | 151 | Surgical | L5/S1 | No  | 5.3  | MD | ✓ |   |
| HD | 153 | Surgical | L5/S1 | Yes | 5.0  | MD | ✓ |   |
| HD | 154 | Surgical | L4/L5 | No  | 3.0  | MD | ✓ |   |
| HD | 156 | Surgical | L4/L5 | Yes | 3.0  | ND | ✓ |   |
| HD | 157 | Surgical | L5/S1 | Yes | 5.0  | I  | ✓ |   |
| HD | 158 | Surgical | L4/L5 | No  | 3.0  | I  | ✓ | ✓ |
| HD | 159 | Surgical | L4/L5 | Yes | 9.0  | I  | ✓ |   |
| HD | 160 | Surgical | C3/C5 | No  | 6.0  | MD | ✓ |   |
| HD | 166 | Surgical | L4/L5 | No  | 8.0  | SD | ✓ |   |
| HD | 170 | Surgical | L5/S1 | No  | 8.0  | SD |   | ✓ |
| HD | 174 | Surgical | L5/S1 | No  | 7.0  | MD | ✓ |   |
| HD | 175 | Surgical | L5/S1 | No  | 7.0  | SD | ✓ |   |
| HD | 177 | Surgical | L4/L5 | No  | 2.0  | N  | ✓ |   |
| HD | 184 | Surgical | L4/L5 | Yes | 5.0  | SD | ✓ |   |
| HD | 192 | Surgical | L5/S1 | No  | 8.0  | SD | ✓ |   |
| HD | 194 | Surgical | L4/L5 | No  | 11.0 | SD | ✓ | ✓ |
| HD | 195 | Surgical | C6/C7 | No  | 9.0  | SD | ✓ |   |
| HD | 197 | Surgical | L4/L5 | No  | 8.0  | SD | ✓ |   |
| HD | 203 | Surgical | S1    | No  | 3.5  |    |   | ✓ |
| HD | 207 | Surgical | L5/S1 | No  | 8.0  | MD | ✓ | ✓ |
| HD | 219 | Surgical | L5/S1 | No  | 10.5 | I  | ✓ |   |
| HD | 225 | Surgical | L5/S1 | No  | 10.0 | SD | ✓ | ✓ |
| HD | 228 | Surgical |       | No  | 6.0  | I  | ✓ |   |
| HD | 229 | Surgical | L5/S1 | No  | 6.0  | MD | ✓ | ✓ |
| HD | 231 | Surgical | L4/L5 | No  | 5.0  | MD | ✓ | ✓ |
| HD | 232 | Surgical | L5/S1 | No  | 8.0  | SD | ✓ | ✓ |
| HD | 233 | Surgical | L5/S1 | No  | 9.5  | SD | ✓ | ✓ |
| HD | 234 | Surgical | L5/S1 | No  | 8.5  | SD | ✓ | ✓ |
| HD | 243 | Surgical | L4/L5 | Yes | 6.0  | I  | ✓ |   |
| HD | 246 | Surgical | L5/S1 | Yes | 6.0  | I  | ✓ |   |
| HD | 253 | Surgical | C5/C6 | Yes | 4.0  | I  | ✓ |   |
| HD | 254 | Surgical | L4/L5 | Yes | 6.0  | I  | ✓ | ✓ |
| HD | 257 | Surgical | L5/S1 | Yes | 6.0  | I  | ✓ |   |
| HD | 266 | Surgical | L5/S1 | No  | 4.0  |    | ✓ | ✓ |
| HD | 276 | Surgical | C5/C6 | No  | 6.0  | MD | ✓ | ✓ |
| HD | 281 | Surgical | L4/L5 | No  | 3.0  | ND | ✓ |   |

---

---

**Supplementary Table II: IVD samples processed at Utrecht: Patient Details**

| Reference | Source  | IVD Level | Thompson Grade | DE | IHC |
|-----------|---------|-----------|----------------|----|-----|
| HD        | S06 115 | PM (UT)   | L4/5           | 1  | ✓   |
| HD        | S08 263 | PM (UT)   | L4/5           | 1  | ✓   |
| HD        | S06 69  | PM (UT)   | L4/5           | 1  | ✓   |
| HD        | S06 123 | PM (UT)   | L4/5           | 1  | ✓   |
| HD        | S07 099 | PM (UT)   | L4/5           | 2  | ✓   |
| HD        | S07184  | PM (UT)   | L4/5           | 2  | ✓   |
| HD        | S06116  | PM (UT)   | L4/5           | 2  | ✓   |
| HD        | S06224  | PM (UT)   | L4/5           | 2  | ✓   |
| HD        | S07 099 | PM (UT)   | L4/5           | 2  | ✓   |
| HD        | S07203  | PM (UT)   | L4/5           | 3  | ✓   |
| HD        | S07229  | PM (UT)   | L4/5           | 3  | ✓   |
| HD        | S06127  | PM (UT)   | L4/5           | 3  | ✓   |
| HD        | S07098  | PM (UT)   | L4/5           | 3  | ✓   |
| HD        | S07137  | PM (UT)   | L4/5           | 3  | ✓   |
| HD        | S07209  | PM (UT)   | L4/5           | 4  | ✓   |
| HD        | S07250  | PM (UT)   | L4/5           | 4  | ✓   |
| HD        | W07243  | PM (UT)   | L4/5           | 4  | ✓   |
| HD        | S06141  | PM (UT)   | L4/5           | 4  | ✓   |
| HD        | S07256  | PM (UT)   | L4/5           | 4  | ✓   |
| HD        | S06150  | PM (UT)   | L4/5           | 5  | ✓   |
| HD        | S06251  | PM (UT)   | L4/5           | 5  | ✓   |
| HD        | S06287  | PM (UT)   | L4/5           | 5  | ✓   |
| HD        | S0741   | PM (UT)   | L4/5           | 5  | ✓   |
| HD        | S06165  | PM (UT)   | L4/5           | 5  | ✓   |

**Supplementary Table III: Articular Cartilage samples: Patient Details.**

| Reference | Source | Anatomical Compartment | Macroscopic Grade                 | Microscopic Grade | DE  | IHC |   |
|-----------|--------|------------------------|-----------------------------------|-------------------|-----|-----|---|
| HC        | 4 (3)  | Surgical               | Medial femoral condyle            | 1                 | 4   | ✓   | ✓ |
| HC        | 5 (2)  | Surgical               | Posterior femoral condyle         | 0                 | 5   | ✓   | ✓ |
| HC        | 7 (1)  | Surgical               | Posterior femoral condyle         | 0                 | 3.5 | ✓   | ✓ |
| HC        | 9 (1)  | Surgical               | Posterior femoral condyle         | 0                 | 2.5 | ✓   | ✓ |
| HC        | 10 (1) | Surgical               | Trochlear                         | 0                 | 5   | ✓   | ✓ |
| HC        | 11 (1) | Surgical               | Posterior condyle                 | 0                 | 3.5 | ✓   | ✓ |
| HC        | 16 (1) | Surgical               | Posterior femoral condyle         | 1                 | 2.5 | ✓   | ✓ |
| HC        | 17 (1) | Surgical               | Medial femoral condyle            | 0                 | 3   | ✓   | ✓ |
| HC        | 18 (1) | Surgical               | Lateral posterior femoral condyle | 1                 | 3   | ✓   | ✓ |
| HC        | 19 (1) | Surgical               | Lateral femoral condyle           | 0                 | 5   | ✓   | ✓ |

**Table IV: Predesigned primer probes for qRT-PCR**

| Gene                                     | Gene Symbol | Catalogue no. |
|------------------------------------------|-------------|---------------|
| Glyceraldehyde-3-phosphate dehydrogenase | GAPDH       | Hs02758991_g1 |
| 18S Ribosomal RNA                        | 18S         | Hs03003631_g1 |
| Forkhead Box F1                          | FOXF1       | Hs00230962_m1 |
| Paired Box 1                             | PAX1        | Hs01071292_m1 |
| Keratin 19                               | KRT19       | Hs01051611_gH |
| Keratin 18                               | KRT18       | Hs02827483_g1 |
| Cluster of differentiation 24            | CD24        | Hs03044178_g1 |
| Glucose transporter 1                    | SLC2A1      | Hs00892681_m1 |
| Brachyury                                | T           | Hs00610080_m1 |
| carbonic anhydrase XII                   | CA12        | Hs01080909_m1 |
| Sonic Hedgehog                           | SHH         | Hs00179843_m1 |
| Laminin Alpha 5                          | LAMA5       | Hs00966585_m1 |
| Laminin gamma 2                          | LAMC2       | Hs01043711_m1 |
| Ovostatin 2                              | OVO2        | Hs00416380_m1 |
| Integrin Binding Sialoprotein            | IBSP        | Hs00173720_m1 |

**SupplementaryTable V: Target antibodies used for IHC**

| Target Antibody         | Clonality         | Optimal Dilution | Antigen Retrieval Method | Secondary Antibody | Serum Block |
|-------------------------|-------------------|------------------|--------------------------|--------------------|-------------|
| FOXF1 (ab23194)         | Rabbit Polyclonal | 1:100            | Heat                     | Goat anti-rabbit   | Goat        |
| PAX1 (ab203065)         | Rabbit Polyclonal | 1:400            | Enzyme                   | Goat anti-rabbit   | Goat        |
| KRT-19 (ab7754)         | Mouse monoclonal  | 1:400            | None                     | Rabbit anti-mouse  | Rabbit      |
| LAM-5 (ab78286)         | Mouse monoclonal  | 1:800            | Enzyme                   | Rabbit anti-mouse  | Rabbit      |
| HIF1 $\alpha$ (ab16066) | Mouse monoclonal  | 1:100            | None                     | Rabbit anti-mouse  | Rabbit      |

**Supplementary Table V:** Target antibodies used for IHC, their optimal concentrations and antigen retrieval methods. Heat antigen retrieval consisted of 10 minute microwave irradiation in 0.05M Tris buffer, pH 9.5 pre-heated to 60°C. Enzyme antigen retrieval consisted of 30-minute incubation in TBS; 20 mM tris, 150 mM sodium chloride, 46.8mM calcium chloride dihydrate pH 7.5, containing 0.01% w/v  $\alpha$ -chymotrypsin from bovine pancreas at 37°C.
